# Supplementary material
Source: PubMed Central journal article supplement (PMC11423244)
Supplement: NIHPP-2023.10.20.562785V2-supplement-1.pdf [file NIHPP-2023.10.20.562785V2-supplement-1.pdf]

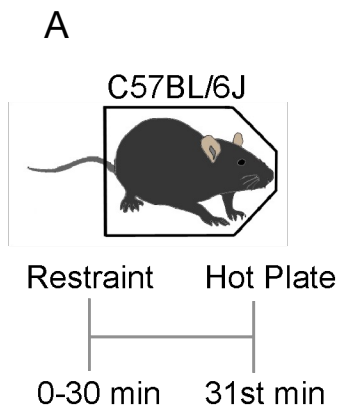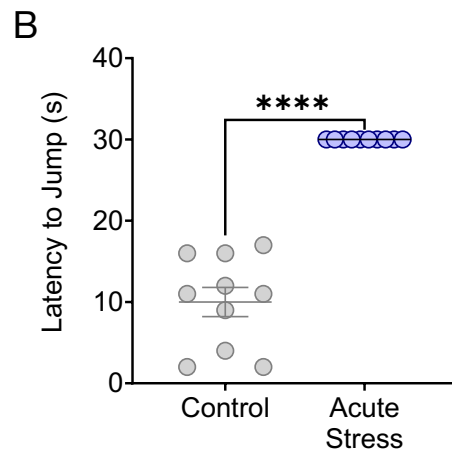

Figure S1

**Supplementary Figure 1. Acute restraint stress causes antinociception.** (A) Cartoon and experimental timeline for restraint stress-induced antinociception. (B) 30 minutes of restraint stress drives thermal antinociception as delayed nocifensive responses on a 55°C hot plate with 30 second cutoff. Student's t-test,  $t = 11.1$ ,  $***p < 0.0001$ . Data represented as mean  $\pm$  SEM.

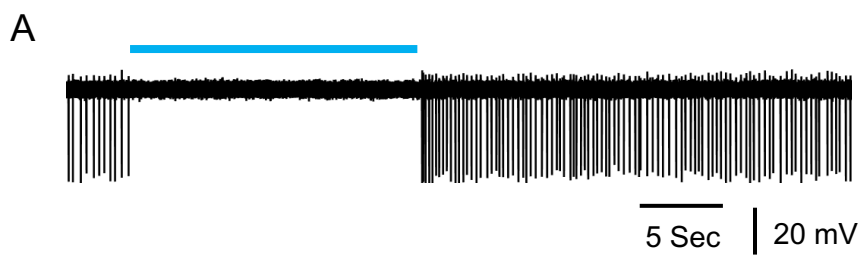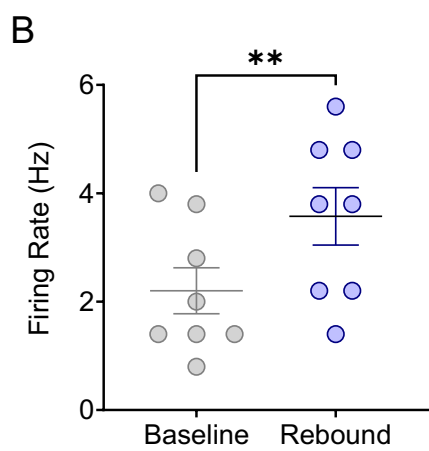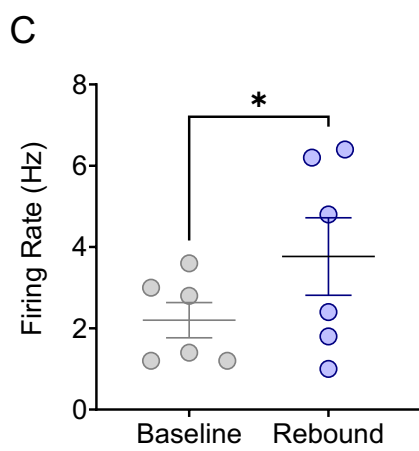

**Supplemental Figure 2. Rebound of neural activity after cessation of stGtACR2-mediated optical inhibition.** (A) Representative cell-attached recording showing stGtACR2-mediated inhibition in spontaneous firing rate from an LC neuron. (B&C) Rebound neural activity following cessation of optical inhibition in either whole-cell (B) or cell-attached (C) recordings. Paired-t tests,  $t = 4.604$  (whole-cell);  $2.731$  (cell-attached),  $*p < 0.05$ ;  $**p < 0.01$ . Data represented as mean  $\pm$  SEM.

A

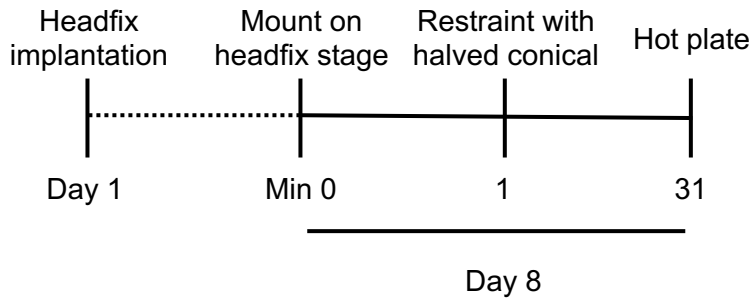

B

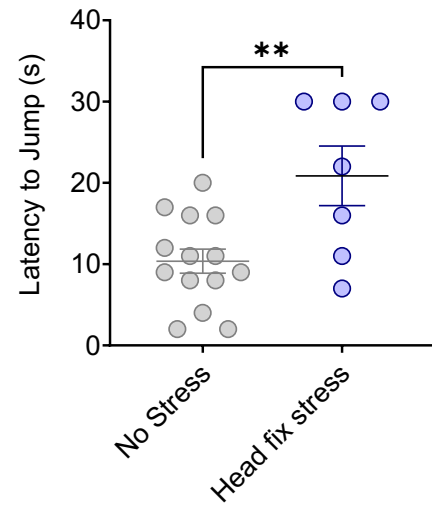

**Supplementary Figure 3: Modified acute restraint stress in concert with head-fixation causes acute antinociception.** (A) Experimental timeline of modified restraint stress-induced antinociceptive testing in the hot plate test. (B) 30 minutes of head-fixed restraint stress drives thermal antinociception as delayed nocifensive responses on a 55°C hot plate with 30 second cutoff. Student's t-test,  $t = 3.184$ ,  $**p < 0.01$ . Data represented as mean  $\pm$  SEM.

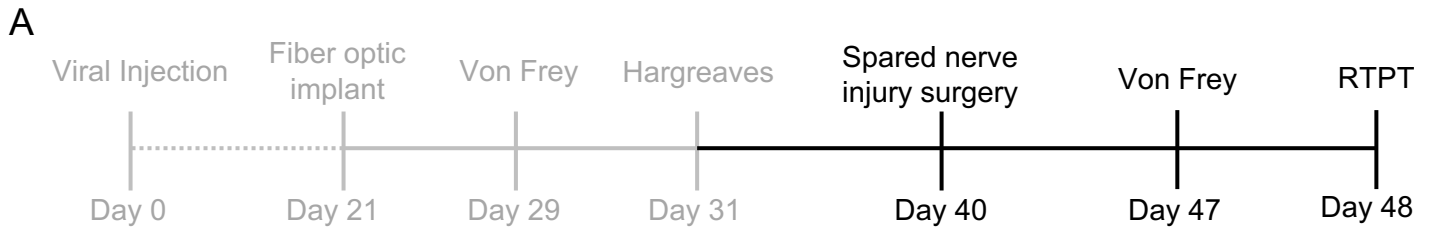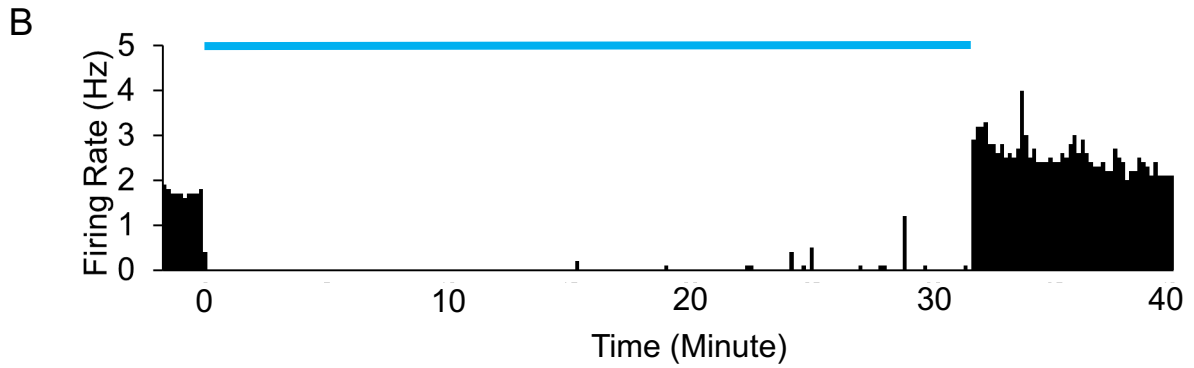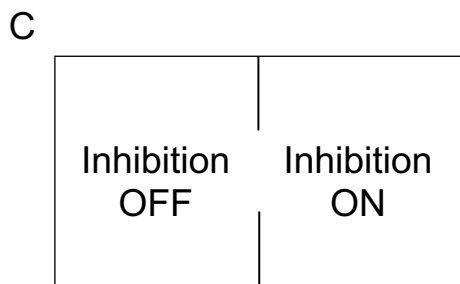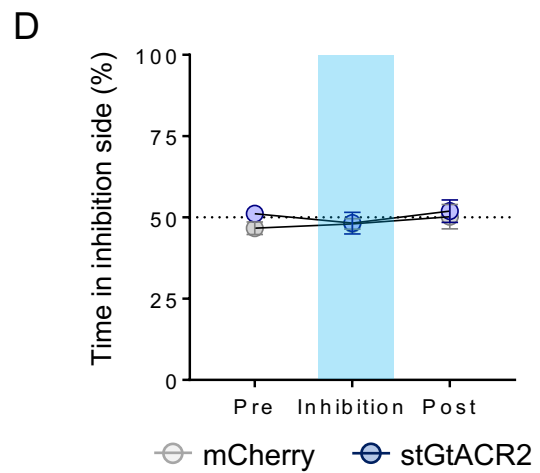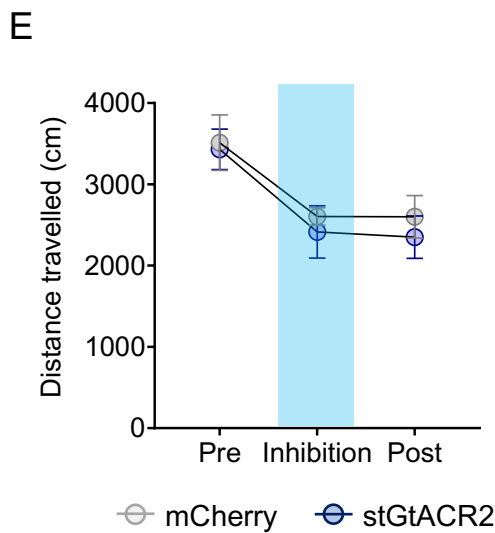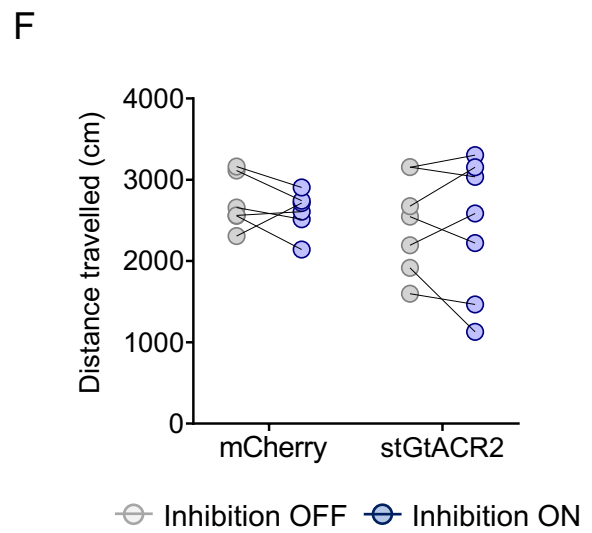

Figure S4

**Supplement Figure 4. LC optical inhibition does not induce real-time preference four weeks after neuropathic injury** (A) Experimental timeline of behavioral testing. (B) Histogram showing prolonged LC optical inhibition for 30 minutes using 100 Hz, 0.5 ms pulse width, 470 nm illumination. (C) Diagram of real-time place testing apparatus. (D) LC inhibition does not induce real-time place preference four weeks post-SNI. Repeated measures two-way ANOVA followed by Tukey's posthoc test,  $F = 0.604$  (Inhibition epoch);  $0.773$  (photo-inhibition);  $0.302$  (interaction);  $1.152$  (animal). (E&F) LC inhibition does not alter distance travelled in real-time place test. Repeated measures two-way ANOVA. For (E):  $F = 14.41$  (inhibition epoch);  $0.346$  (photo-inhibition);  $0.082$  (interaction);  $2.965$  (animal). For (F):  $F = 0.559$  (inhibition On/Off);  $0.643$  (photo-inhibition);  $0.119$  (interaction);  $8.129$  (animal). Data represented as mean  $\pm$  SEM, no significant difference was found.



A

*Oprm1*<sup>-/-</sup> (MOR KO)

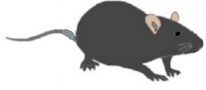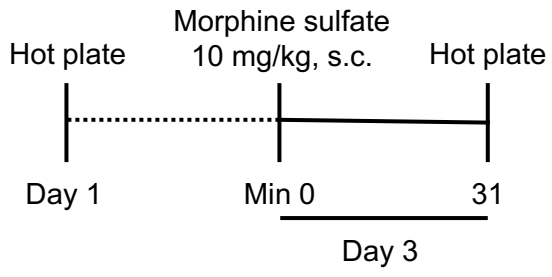

B

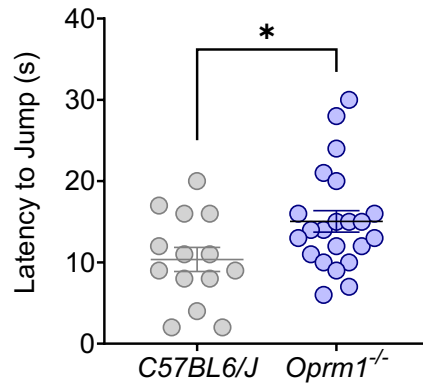

C

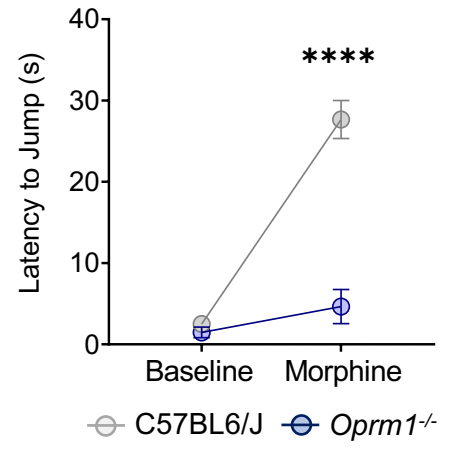

Figure S5

**Supplement Figure 5. Global *Oprm1* knockout influences nociceptive responses (A)** Experimental timeline for behavioral tests. **(B)** Naïve *oprm1*<sup>-/-</sup> mice have increased nociceptive thresholds on the hot plate. Student's T-test,  $t = 2.297$ ,  $*p < 0.05$ . **(C)** *Oprm1*<sup>-/-</sup> mice do not have morphine analgesia. Repeated measures two-way ANOVA followed by Tukey's posthoc test,  $F = 48.41$  (MOR KO);  $37.60$  (Morphine application);  $29.14$  (interaction);  $0.927$  (animal),  $****p < 0.0001$ . Data represented as mean  $\pm$  SEM.

A

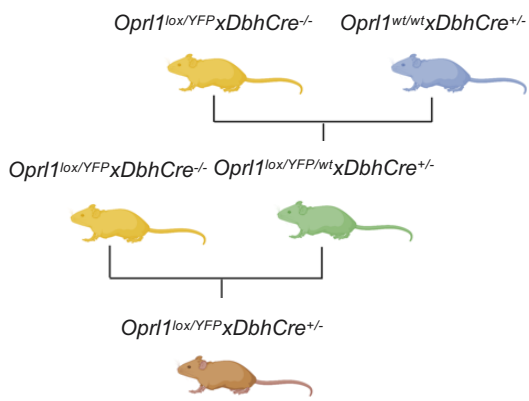

B

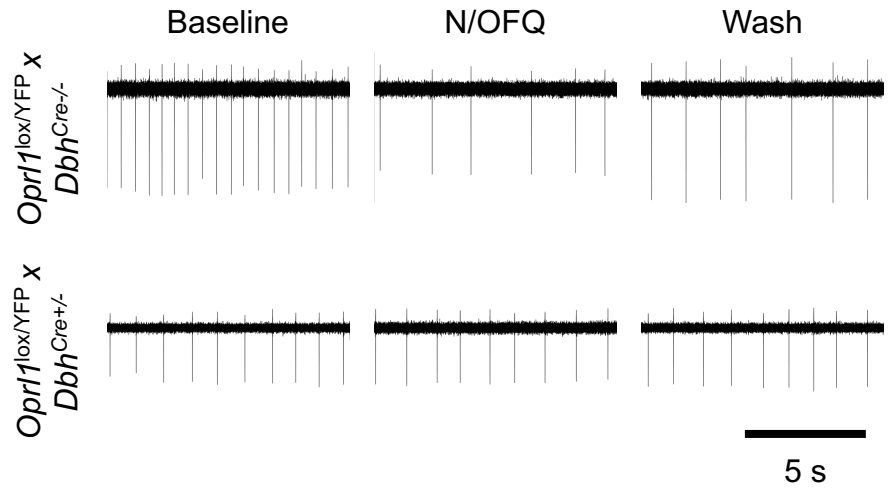

C

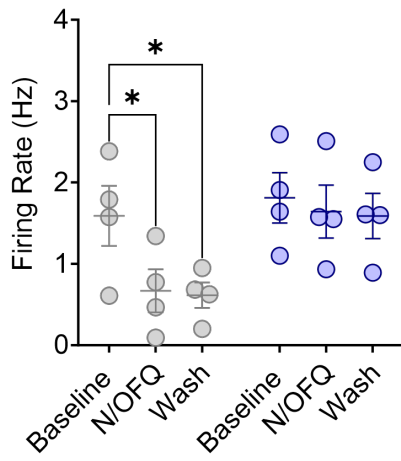

○  $Opr1^{lox/YFP \times DbhCre^{-/-}}$

●  $Opr1^{lox/YFP \times DbhCre^{+/-}}$

D

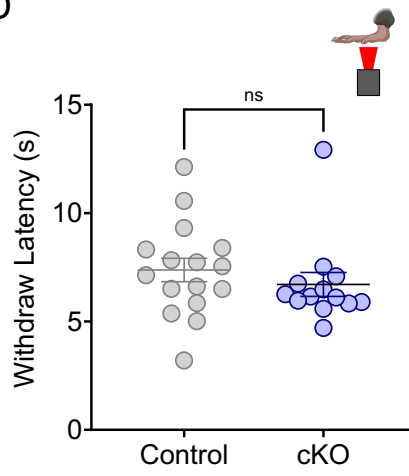

E

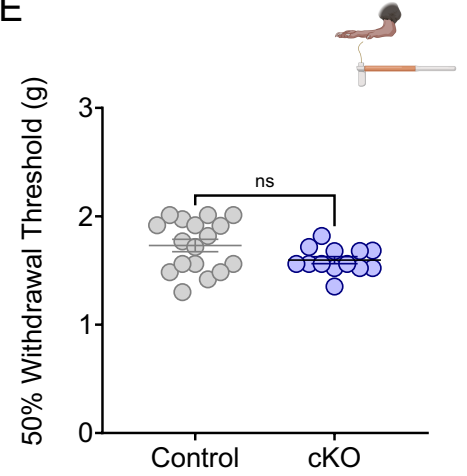

**Supplement Figure 6. Noradrenergic NOP is not required for noradrenergic-modulated nociception.** (A) Schematic describing the breeding strategy of *Opr1*<sup>lox/YFP</sup>*xDbh*<sup>Cre+/-</sup> conditional knockout mouse line. (B) Representative traces of cell-attached LC recordings with NOP cKO (*Opr1*<sup>lox/YFP</sup>*xDbh*<sup>Cre+/-</sup>) losing N/OFQ-mediated LC inhibition (bottom) compared to Control mice (*Opr1*<sup>lox/YFP</sup>*xDbh*<sup>Cre-/-</sup>). (C) N/OFQ-mediated inhibition of LC neurons is lost in *Opr1*<sup>lox/YFP</sup>*xDbh*<sup>Cre+/-</sup> mice. Repeated-measures two-way ANOVA, F = 24.86 (cKO); 3.306 (pharmacology); 10.68 (interaction); 26.80 (cell), \*p<0.05. (D&E) Hargreaves (Mann-Whitney, U = 69, ns = not significant) (D) and von Frey (Student's t-test, t = 1.886, ns = not significant) (E) tests showing that the conditional exclusion of NOP in noradrenergic neurons does not alter baseline nociception. Data represented as mean ± SEM.

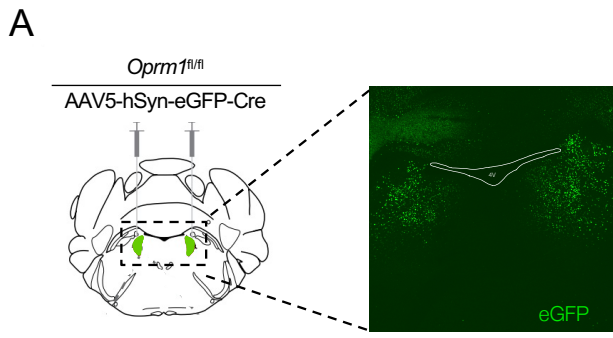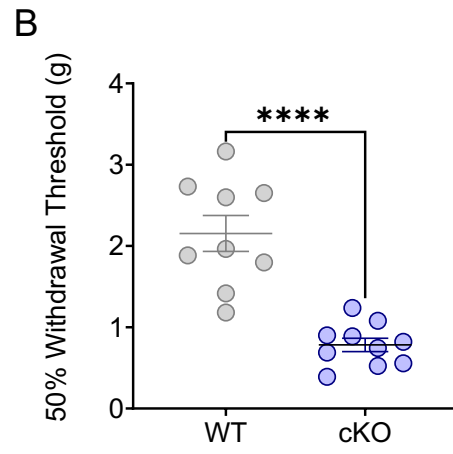

**Supplementary Figure 7. Spatial expression of Cre recombinase in the adult LC of *Oprm1<sup>fl/fl</sup>* mice causes mechanical hypersensitivity.** (A) Schematic and fluorescent image of the bilateral viral Cre expression in the LC. (B) *oprm1* deletion in the LC decreases baseline 50% mechanical withdrawal threshold. Student's t-test,  $t = 6.06$ , \*\*\*\* $p < 0.0001$ . Data represented as mean  $\pm$  SEM.

**A**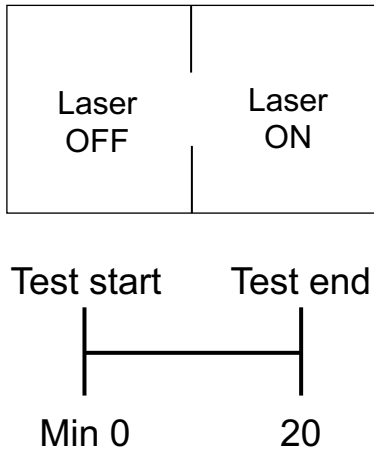**B**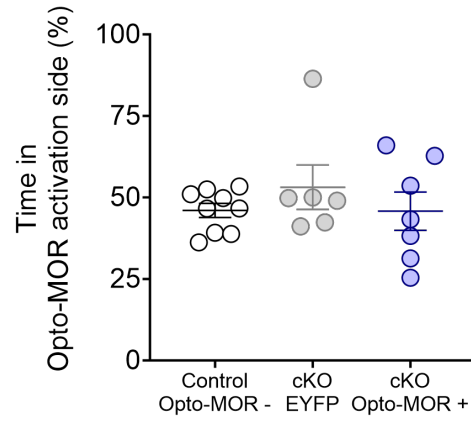**C**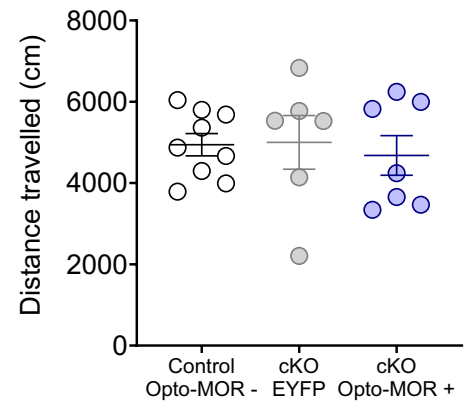

**Supplementary Figure 8. Optical activation of Opto-MOR signaling in LC of *Oprm1<sup>fl/fl</sup> × Dbh<sup>Cre+/-</sup>* mice does not alter real-time place preference or locomotor behavior.** (A) Schematics illustrating the experimental arrangement of real-time place preference test. (B) % time spent in Opto-MOR-paired side of real-time place testing apparatus shows no significant difference between groups. Kruskal-Wallis test, Kruskal-Wallis statistic = 0.4421. (C) Distance travelled during real-time place testing shows no significant effect of opto-MOR activation. One-way ANOVA,  $F = 0.1352$ . Data represented as mean  $\pm$  SEM, no significant difference was found.
